# Supplementary material
Source: Elsevier journal article supplement (https://www.sciencedirect.com/science/article/pii/S2341192921001013)
Supplement: mmc5 [file S2341192921001013:mmc5.pdf]

**Autor(es):** Fabián Casas-Arroyave; Estefania Ramirez-Mendoza; Andres Ocampo-Agudelo  
**Pregunta:** Bloqueo infraclavicular comparado con Bloqueo supraclavicular para Anestesia del miembro superior  
**Configuración:**  
**Bibliografía:**

| Certainty assessment |                   |                 |                |                     |             |                       | Nº de pacientes         |                         | Efecto            |                   | Certainty | Importancia |
|----------------------|-------------------|-----------------|----------------|---------------------|-------------|-----------------------|-------------------------|-------------------------|-------------------|-------------------|-----------|-------------|
| Nº de estudios       | Diseño de estudio | Riesgo de sesgo | Inconsistencia | Evidencia indirecta | Imprecisión | Otras consideraciones | Bloqueo infraclavicular | Bloqueo supraclavicular | Relativo (95% CI) | Absoluto (95% CI) |           |             |

**Complicaciones Anestésicas**

|    |                    |             |             |                    |             |         |               |               |                                 |                                                     |                  |         |
|----|--------------------|-------------|-------------|--------------------|-------------|---------|---------------|---------------|---------------------------------|-----------------------------------------------------|------------------|---------|
| 16 | ensayos aleatorios | no es serio | no es serio | serio <sup>a</sup> | no es serio | ninguno | 34/642 (5.3%) | 44/651 (6.8%) | <b>RR 0.78</b><br>(0.51 a 1.21) | <b>15 menos por 1000</b><br>(de 33 menos a 14 más ) | ⊕⊕⊕○<br>MODERADO | CRÍTICO |
|----|--------------------|-------------|-------------|--------------------|-------------|---------|---------------|---------------|---------------------------------|-----------------------------------------------------|------------------|---------|

**Exito anestésico**

|    |                    |             |             |             |             |         |                 |                 |                                 |                                                  |              |         |
|----|--------------------|-------------|-------------|-------------|-------------|---------|-----------------|-----------------|---------------------------------|--------------------------------------------------|--------------|---------|
| 16 | ensayos aleatorios | no es serio | no es serio | no es serio | no es serio | ninguno | 601/642 (93.6%) | 594/651 (91.2%) | <b>RR 1.01</b><br>(0.98 a 1.04) | <b>9 más por 1000</b><br>(de 18 menos a 36 más ) | ⊕⊕⊕⊕<br>ALTA | CRÍTICO |
|----|--------------------|-------------|-------------|-------------|-------------|---------|-----------------|-----------------|---------------------------------|--------------------------------------------------|--------------|---------|

**Tiempo de realización del bloqueo (evaluado con : minutos)**

|    |                    |       |                        |                    |                    |         |     |     |   |                                                        |                  |            |
|----|--------------------|-------|------------------------|--------------------|--------------------|---------|-----|-----|---|--------------------------------------------------------|------------------|------------|
| 13 | ensayos aleatorios | serio | muy serio <sup>b</sup> | serio <sup>b</sup> | serio <sup>c</sup> | ninguno | 542 | 550 | - | <b>MD 0.88 min menor</b><br>(1.41 menor a 0.35 menor ) | ⊕○○○<br>MUY BAJA | IMPORTANTE |
|----|--------------------|-------|------------------------|--------------------|--------------------|---------|-----|-----|---|--------------------------------------------------------|------------------|------------|

**Tiempo de latencia anestésica (evaluado con : minutos)**

|   |                    |                    |                    |                    |                    |         |     |     |   |                                                               |                  |            |
|---|--------------------|--------------------|--------------------|--------------------|--------------------|---------|-----|-----|---|---------------------------------------------------------------|------------------|------------|
| 7 | ensayos aleatorios | serio <sup>d</sup> | serio <sup>d</sup> | serio <sup>b</sup> | serio <sup>c</sup> | ninguno | 305 | 304 | - | <b>MD 0.28 min más alto.</b><br>(2.06 menor a 2.61 más alto.) | ⊕○○○<br>MUY BAJA | IMPORTANTE |
|---|--------------------|--------------------|--------------------|--------------------|--------------------|---------|-----|-----|---|---------------------------------------------------------------|------------------|------------|

**CI:** Intervalo de confianza ; **RR:** Razón de riesgo; **MD:** Diferencia media

**Explicaciones**

- a. La mayoría de los ensayos clínicos incluidos no fueron diseñados para evaluar eventos adversos derivado de las intervenciones. En ese sentido los datos reportados de complicaciones anestésicas perioperatorias en casi todos los estudios no estuvieron adecuadamente discriminados ni el tipo, la severidad, o el momento de aparición. Por tal motivo existe riesgo de evidencia indirecta.
- b. En casi todos los estudios evaluados, este desenlace no estuvo dentro de los objetivos por tal motivo no es posible determinar como se estandarizó y se realizó la toma de este tiempo. Los resultados obtenidos para efecto de esta revisión derivan de la información que los autores aportan en el resumen o en la discusión de los artículos. Adicionalmente, es altamente probable que las técnicas de bloqueo varíaran ampliamente entre los diferentes estudios incluidos.
- c. Los intervalos de confianza en los estudios incluidos para este desenlace demuestran gran variabilidad entre ellos , y en varios de los casos muy amplios. Esto puede estar en relación a la estandarización no solo de lo toma del dato sino también en la técnica anestésica empleada.
- d. El riesgo de heterogeneidad e inconsistencia de los resultados es muy alto debido a que cada estudio estableció diferentes maneras de evaluar la calidad del bloqueo anestésico. No es posible aislar el factor que lleva a este riesgo de heterogeneidad.
