# Supplementary material
Source: Elsevier journal article supplement (https://www.sciencedirect.com/science/article/pii/S2341192921001013)
Supplement: mmc7 [file S2341192921001013:mmc7.pdf]

**Autor(es):** Fabián Casas-Arroyave; Estefania Ramirez-Mendoza; Andres Ocampo-Agudelo  
**Pregunta:** Bloqueo axilar comparado con Bloqueo supraclavicular para Anestesia del miembro superior  
**Configuración:**  
**Bibliografía:**

| Certainty assessment                                       |                    |                        |                        |                     |                        |                                                             | Nº de pacientes |                         | Efecto                    |                                                          | Certainty        | Importancia |
|------------------------------------------------------------|--------------------|------------------------|------------------------|---------------------|------------------------|-------------------------------------------------------------|-----------------|-------------------------|---------------------------|----------------------------------------------------------|------------------|-------------|
| Nº de estudios                                             | Diseño de estudio  | Riesgo de sesgo        | Inconsistencia         | Evidencia indirecta | Imprecisión            | Otras consideraciones                                       | Bloqueo axilar  | Bloqueo supraclavicular | Relativo (95% CI)         | Absoluto (95% CI)                                        |                  |             |
| Complicaciones anestésicas                                 |                    |                        |                        |                     |                        |                                                             |                 |                         |                           |                                                          |                  |             |
| 4                                                          | ensayos aleatorios | no es serio            | serio <sup>a</sup>     | no es serio         | muy serio <sup>b</sup> | ninguno                                                     | 5/134 (3.7%)    | 2/137 (1.5%)            | RR 2.56<br>(0.50 a 12.95) | 23 más por 1000<br>(de 7 menos a 174 más )               | ⊕○○○<br>MUY BAJA | CRÍTICO     |
| Éxito anestésico                                           |                    |                        |                        |                     |                        |                                                             |                 |                         |                           |                                                          |                  |             |
| 4                                                          | ensayos aleatorios | no es serio            | no es serio            | no es serio         | no es serio            | ninguno                                                     | 115/134 (85.8%) | 127/137 (92.7%)         | RR 0.93<br>(0.85 a 1.01)  | 65 menos por 1000<br>(de 139 menos a 9 más )             | ⊕⊕⊕⊕<br>ALTA     | CRÍTICO     |
| Tiempo de realización del bloqueo (evaluado con : minutos) |                    |                        |                        |                     |                        |                                                             |                 |                         |                           |                                                          |                  |             |
| 4                                                          | ensayos aleatorios | serio <sup>c</sup>     | serio <sup>a</sup>     | no es serio         | no es serio            | se sospechaba fuertemente sesgo de publicación <sup>d</sup> | 134             | 137                     | -                         | MD 1.43 min más alto.<br>(1.33 menor a 4.2 más alto.)    | ⊕○○○<br>MUY BAJA | IMPORTANTE  |
| Tiempo de latencia anestésica (evaluado con : minutos)     |                    |                        |                        |                     |                        |                                                             |                 |                         |                           |                                                          |                  |             |
| 3                                                          | ensayos aleatorios | muy serio <sup>c</sup> | muy serio <sup>a</sup> | no es serio         | serio <sup>e</sup>     | se sospechaba fuertemente sesgo de publicación <sup>d</sup> | 100             | 100                     | -                         | MD 0.21 min más alto.<br>(16.47 menor a 16.88 más alto.) | ⊕○○○<br>MUY BAJA | IMPORTANTE  |

**CI:** Intervalo de confianza ; **RR:** Razón de riesgo; **MD:** Diferencia media

Explicaciones

- a. Existen resultados divergentes a favor de una u otra intervención entre los cuatro estudios incluidos.
- b. Existen pocos desenlaces en los estudios incluidos.
- c. Alto riesgo de heterogeneidad entre los estudios incluidos para este desenlace.
- d. Presentan riesgo de sesgo de publicación de acuerdo a la gráfica de funnel plot.
- e. Los tiempos reportados son altamente imprecisos en los tres estudios incluidos
